# Supplementary material for: The treatment of hypertension in people with dementia: a systematic review of observational studies
Source: Springer Nature journal article supplement (doi:10.1186/1471-2318-14-19), 2014-02-12
Supplement: 12877_2013_956_MOESM3_ESM.pdf [file 12877_2013_956_MOESM3_ESM.pdf]

Identification

Records identified through  
database searching  
(n = 4079)

Screening

Records after duplicates removed and limits applied  
(n = 2627)

Records screened  
(n = 2627)

Records excluded  
(n = 2583)

Eligibility

Full-text articles assessed  
for eligibility  
(n = 43)

Full-text articles excluded  
(n = 31)

Article located from  
bibliographies  
(n = 1)

Included

Studies included in  
qualitative synthesis  
(n = 13)

Studies included in  
quantitative synthesis  
(meta-analysis)  
(n = 6 to 13)
